# Supplementary material for: Awareness and Use of Virtual Clinics following the COVID-19 Pandemic in Saudi Arabia
Source: Healthcare (Basel). 2022 Sep 28;10(10):1893. doi: 10.3390/healthcare10101893 (PMC9601837; doi:10.3390/healthcare10101893)
Supplement: Supplementary file 1 [file healthcare-10-01893-s001.zip › healthcare-1891168-supplementary.pdf]

## Virtual Clinics Questionnaire

1. Are you aware of the presence of virtual clinics in Saudi Arabia?
  - ☐ Yes
  - ☐ No
2. Have you ever used virtual clinics before?
  - ☐ Yes
  - ☐ No
3. If you answered yes, please specify the name of the healthcare facility (or facilities) that has/have provided you with the virtual clinic service  
.....  
.....
4. How many times have you used virtual clinics?
  - ☐ Once
  - ☐ Twice
  - ☐ More than 2 times
5. In your last visit to the virtual clinic, what was the type of the healthcare facility?
  - ☐ Private
  - ☐ Governmental
6. In your last visit to the virtual clinic, what was the type of your visit?
  - ☐ Initial consultation
  - ☐ Follow up
7. In your last visit to the virtual clinic, who was the visit for?
  - ☐ You
  - ☐ Someone else
8. In your last visit to the virtual clinic, what was the clinic type?
  - ☐ Family medicine
  - ☐ Internal medicine
  - ☐ Pediatric
  - ☐ Gynecology
  - ☐ Ophthalmology
  - ☐ Dermatology
  - ☐ Ear, nose, and throat surgery
  - ☐ Psychiatric
  - ☐ Neurology
  - ☐ Urology
  - ☐ Dentistry
  - ☐ Orthopedic
  - ☐ Other .....

**9. In your last visit to the virtual clinic, what device have you used?**

- Mobile phone
- Tablet (ex: iPad)
- Laptop
- Other.....

**10. In your last visit to the virtual clinic, what was the communication type?**

- Voice call (only voice)
- Video call (voice and picture)

**11. To what extent do you agree with the following statements?**

| #  | Statement                                                                                                           | Strongly agree | Agree | Neutral | Disagree | Strongly disagree |
|----|---------------------------------------------------------------------------------------------------------------------|----------------|-------|---------|----------|-------------------|
| 1  | Using virtual clinics would improve the quality of my health care.                                                  |                |       |         |          |                   |
| 2  | Using virtual clinics would improve my access to healthcare services.                                               |                |       |         |          |                   |
| 3  | Using virtual clinics would save my time.                                                                           |                |       |         |          |                   |
| 4  | Overall, I find virtual clinics highly useful.                                                                      |                |       |         |          |                   |
| 5  | I would find that using virtual clinics is easy.                                                                    |                |       |         |          |                   |
| 6  | I would find it easy for myself to interact with doctors using virtual clinics.                                     |                |       |         |          |                   |
| 7  | Interacting with virtual clinics' systems would be clear for me.                                                    |                |       |         |          |                   |
| 8  | Overall, I would find that using virtual clinics is convenient.                                                     |                |       |         |          |                   |
| 9  | I like the idea of using virtual clinics.                                                                           |                |       |         |          |                   |
| 10 | Using virtual clinics is a wise idea.                                                                               |                |       |         |          |                   |
| 11 | Using virtual clinics would be a pleasant experience                                                                |                |       |         |          |                   |
| 12 | Utilizing virtual clinics is good.                                                                                  |                |       |         |          |                   |
| 13 | Relatives would support me to use virtual clinics.                                                                  |                |       |         |          |                   |
| 14 | Friends would support me to use virtual clinics.                                                                    |                |       |         |          |                   |
| 15 | Medical care personnel would support me to use virtual clinics.                                                     |                |       |         |          |                   |
| 16 | Media (socializing applications, social media influencers, news channels) would support the use of virtual clinics. |                |       |         |          |                   |

**12. What is your gender?**

- ☐ Male
- ☐ Female

**13. What is your nationality?**

- ☐ Saudi
- ☐ Non-Saudi

**14. What is your age?**

- ☐ Less than 18
- ☐ 18-25
- ☐ 26-30
- ☐ 31-35
- ☐ 36-40
- ☐ 41-45
- ☐ 46-50
- ☐ 51-55
- ☐ More than 55

**15. What is your marital status?**

- ☐ Single
- ☐ Married
- ☐ Separated
- ☐ Widowed

**16. In which province do you live?**

- ☐ Eastern
- ☐ Riyadh
- ☐ Qassim
- ☐ Makkah
- ☐ Madinah
- ☐ Ha'il
- ☐ Al Jawf
- ☐ Tabuk
- ☐ Northern Borders
- ☐ Aseer
- ☐ Jizan
- ☐ Najran
- ☐ Al Baha

**17. What is your education level?**

- ☐ Primary school or less
- ☐ Intermediate school
- ☐ High school
- ☐ Diploma
- ☐ Bachelor's degree
- ☐ Postgraduate degree

**18. Do you have any chronic diseases?**

- ☐ Yes
- ☐ No

**19. What chronic diseases have you been diagnosed with (you can choose more than one answer)?**

- ☐ Heart and cardiovascular diseases
- ☐ Hypertension
- ☐ Tumors
- ☐ Lung and respiratory diseases
- ☐ Diabetes
- ☐ Endocrine diseases
- ☐ Other.....

**20. What is your employment status?**

- ☐ Employed
- ☐ Unemployed
- ☐ Retired

**21. What is your income?**

- ☐ Less than 5,000 SR
- ☐ Between 5,001 and 10,000 SR
- ☐ Between 10,001 and 15,000 SR
- ☐ Between 15,001 and 20,000 SR
- ☐ More than 20,000 SR

**THE END**
